# Supplementary material
Source: PubMed Central journal article supplement (PMC7965277)
Supplement: 14-01208.pdf [file 14-01208.pdf]

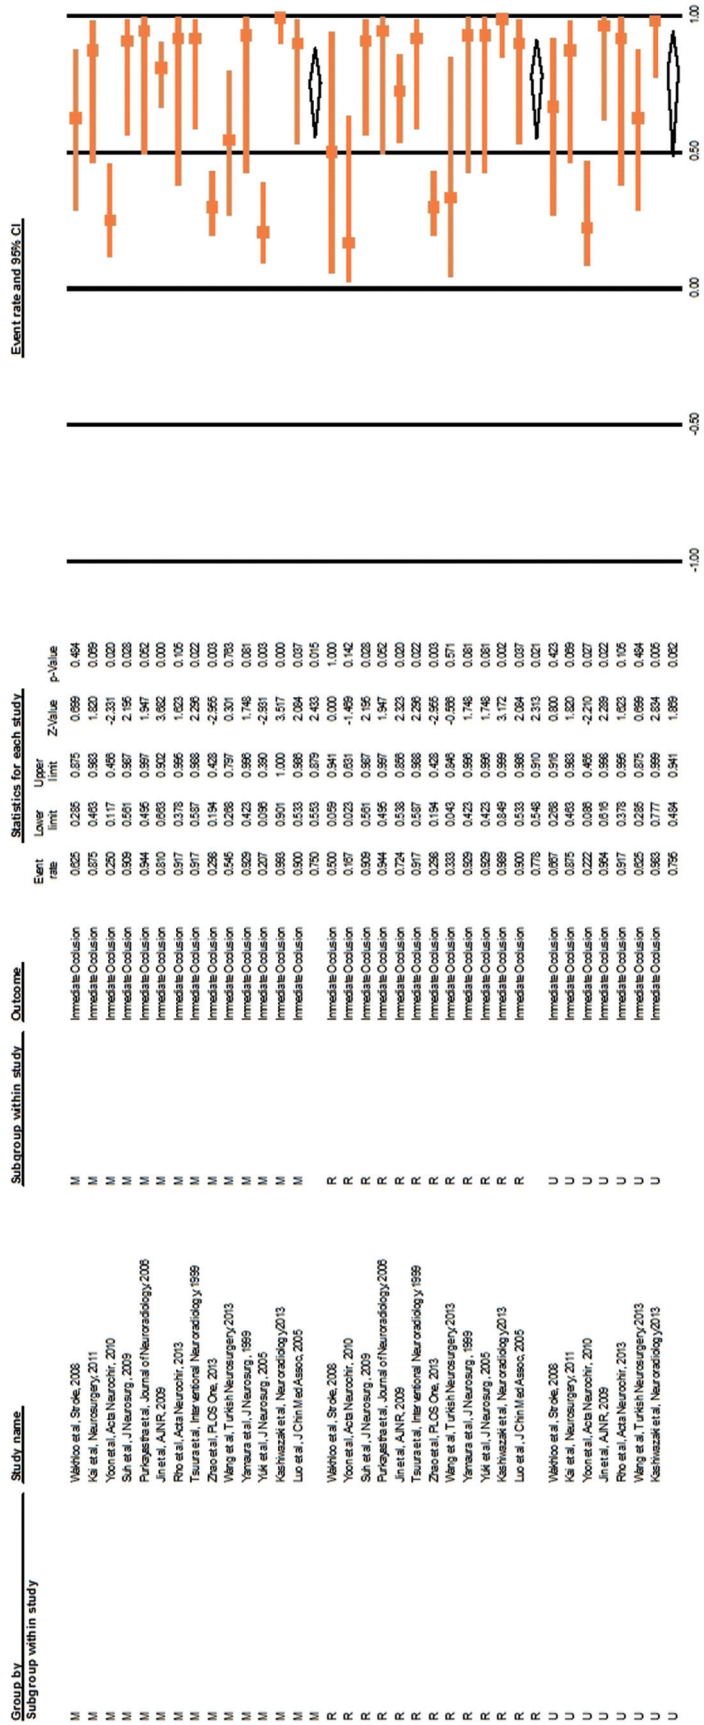

**ON-LINE FIG 1.** Immediate occlusion rates. U indicates unruptured; R, ruptured; M, mixed.

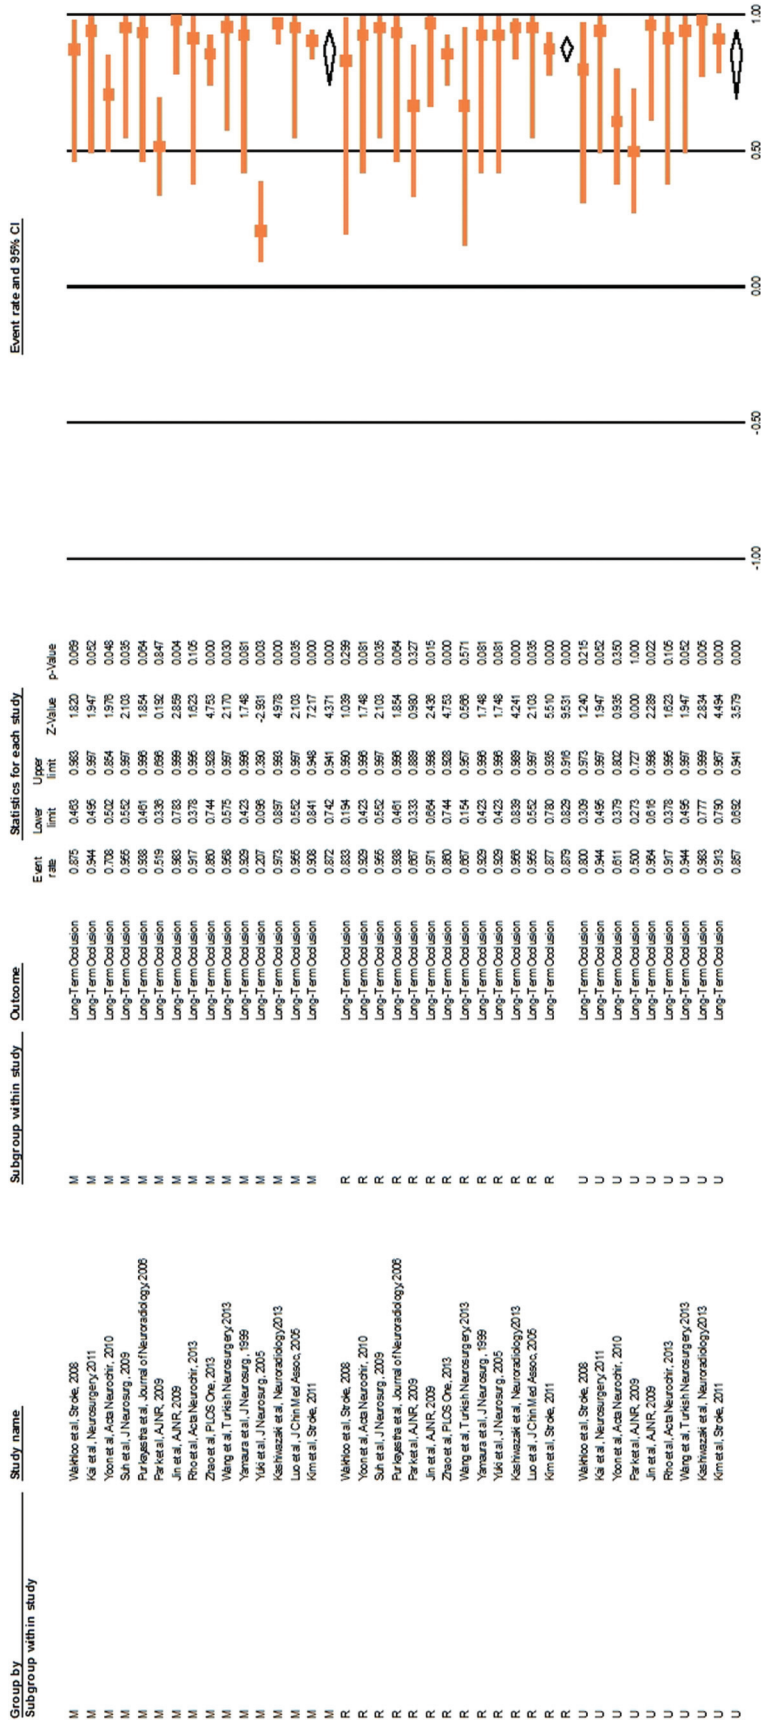

**ON-LINE FIG 2.** Long-term occlusion rates. U indicates unruptured; R, ruptured; M, mixed.

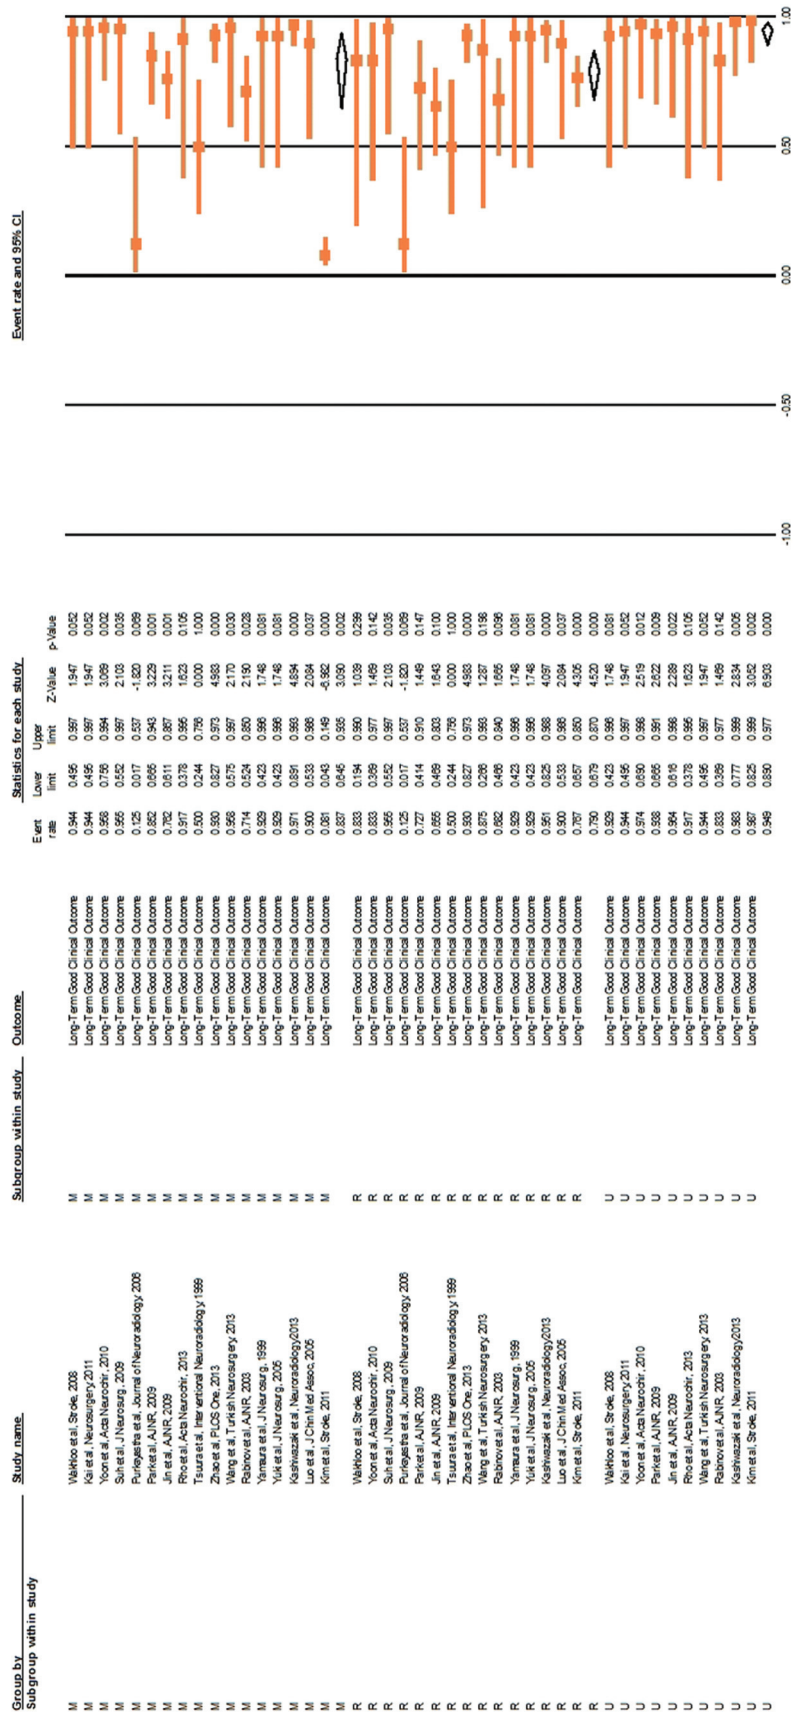

**ON-LINE FIG 3.** Long-term good clinical outcome rates. U indicates unruptured; R, ruptured; M, mixed.

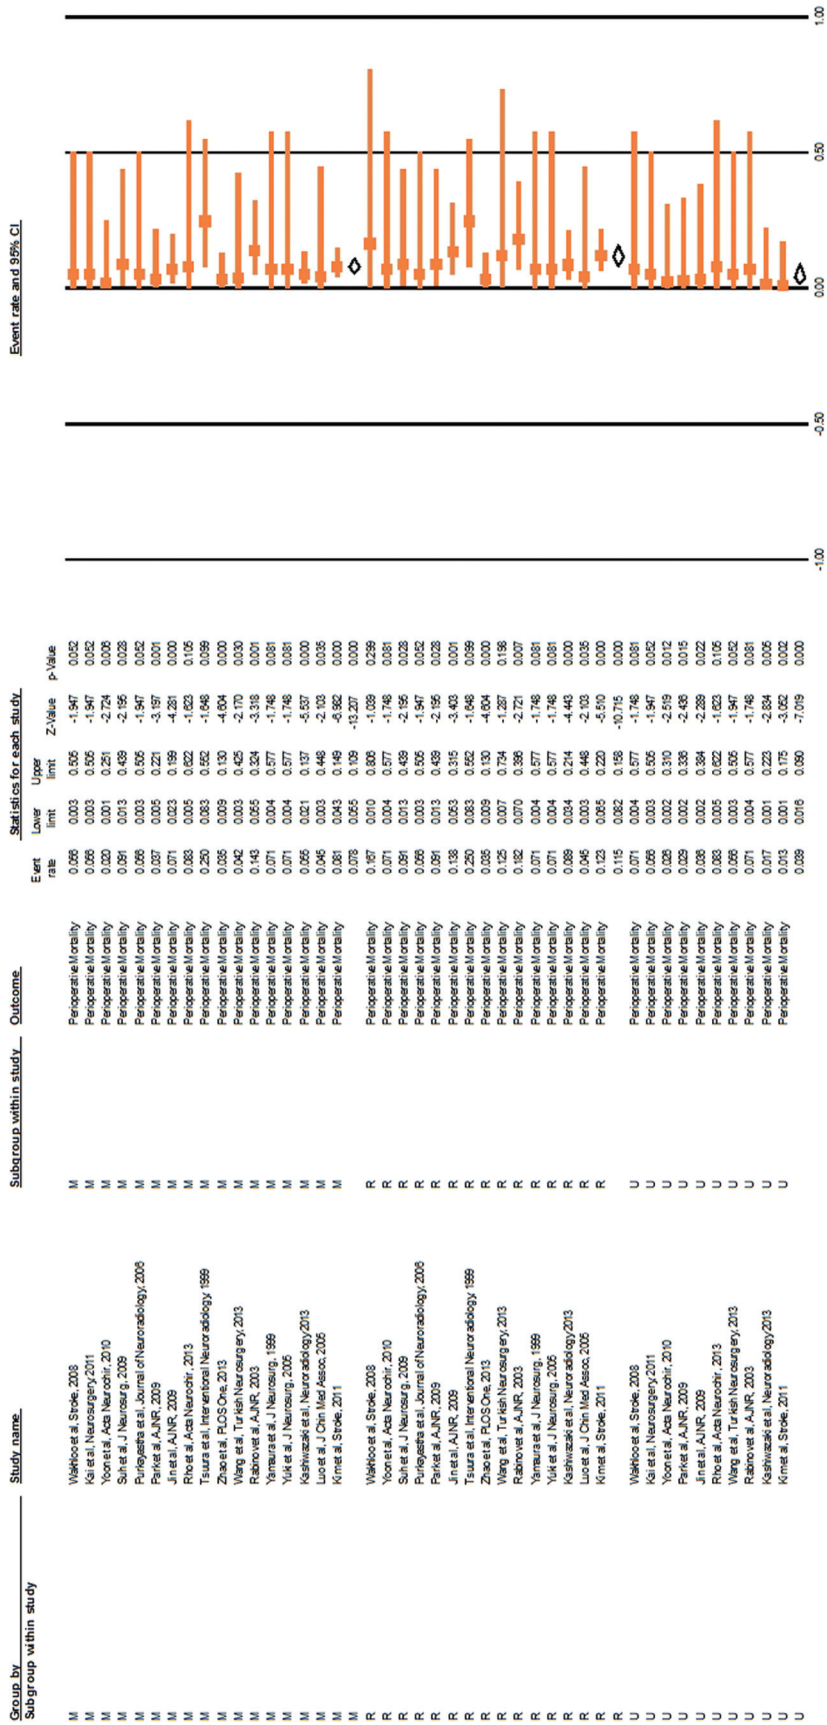

**ON-LINE FIG 4.** Perioperative mortality. U indicates unruptured; R, ruptured; M, mixed.

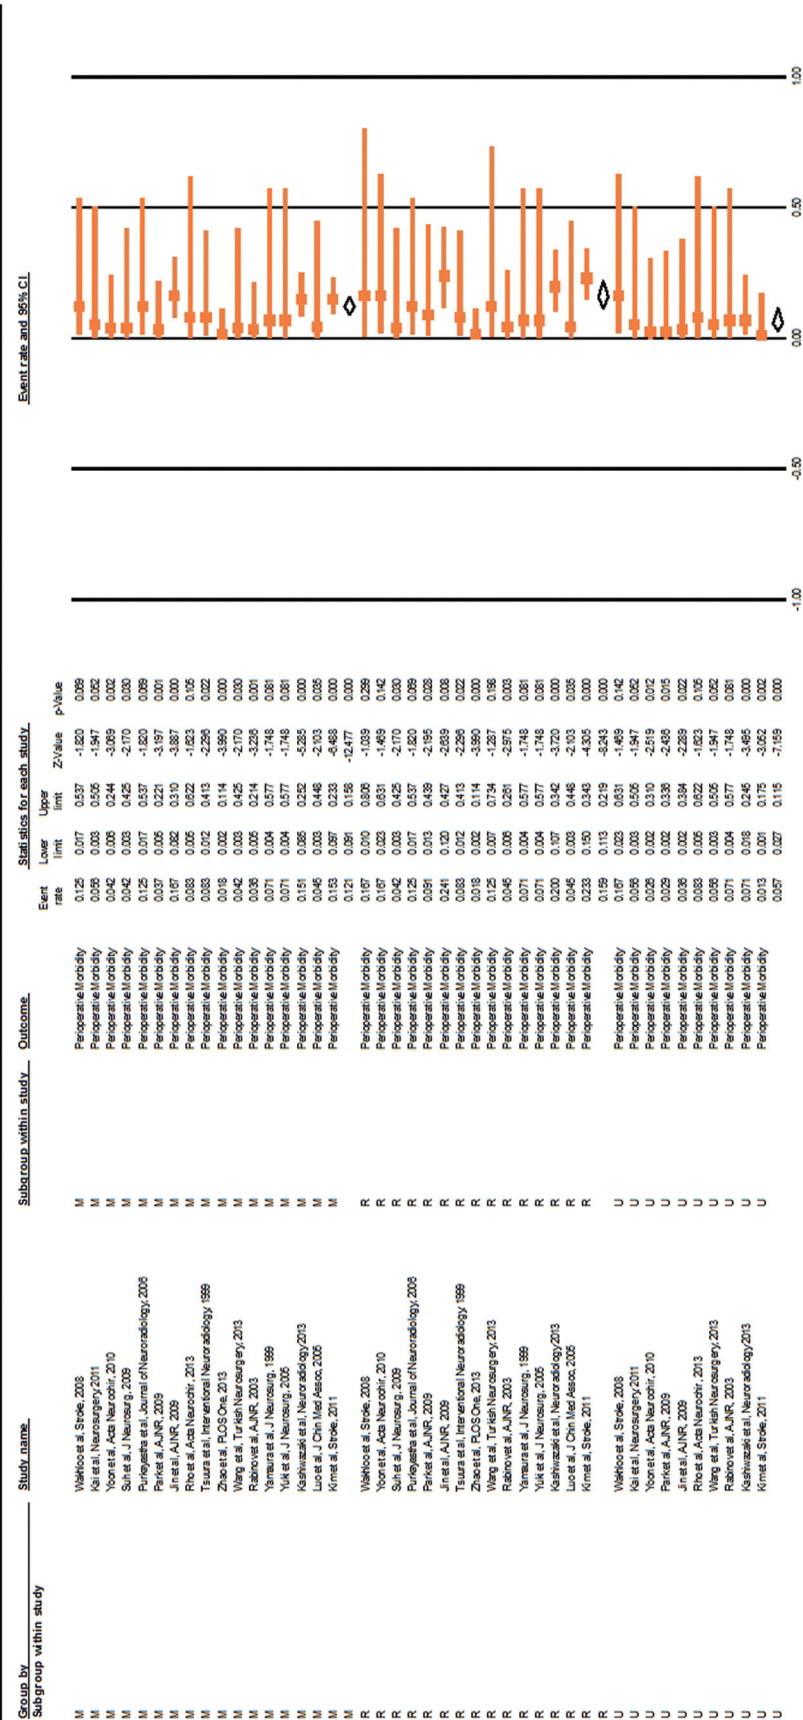

**ON-LINE FIG 5.** Perioperative morbidity. U indicates unruptured; R, ruptured; M, mixed.

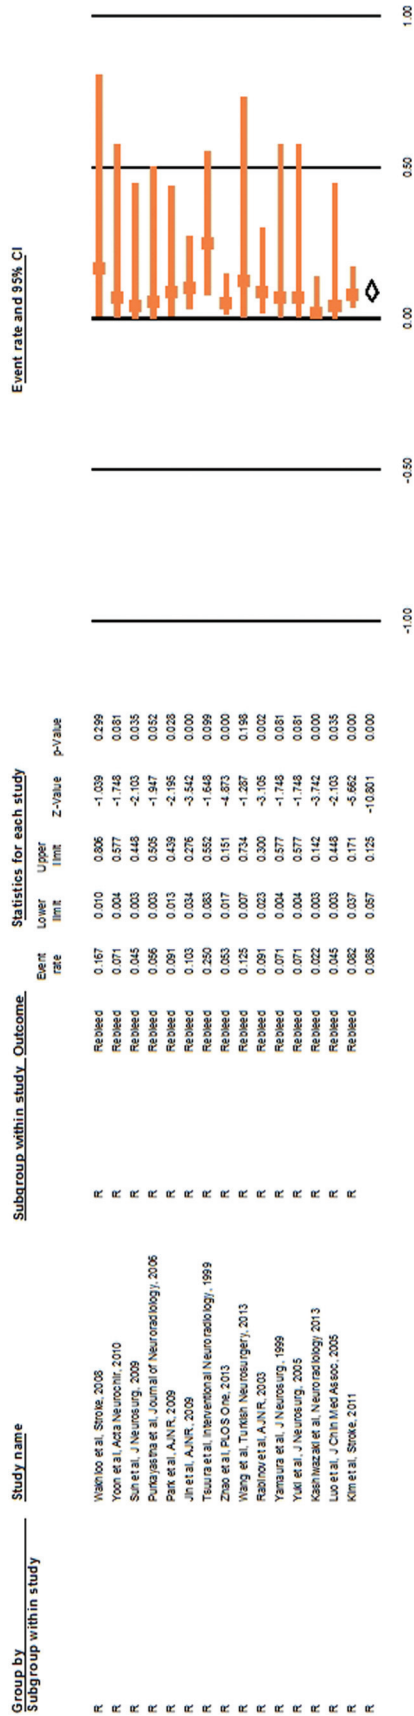

**ON-LINE FIG 6.** Rebleeding rates. U indicates unruptured; R, ruptured; M, mixed.

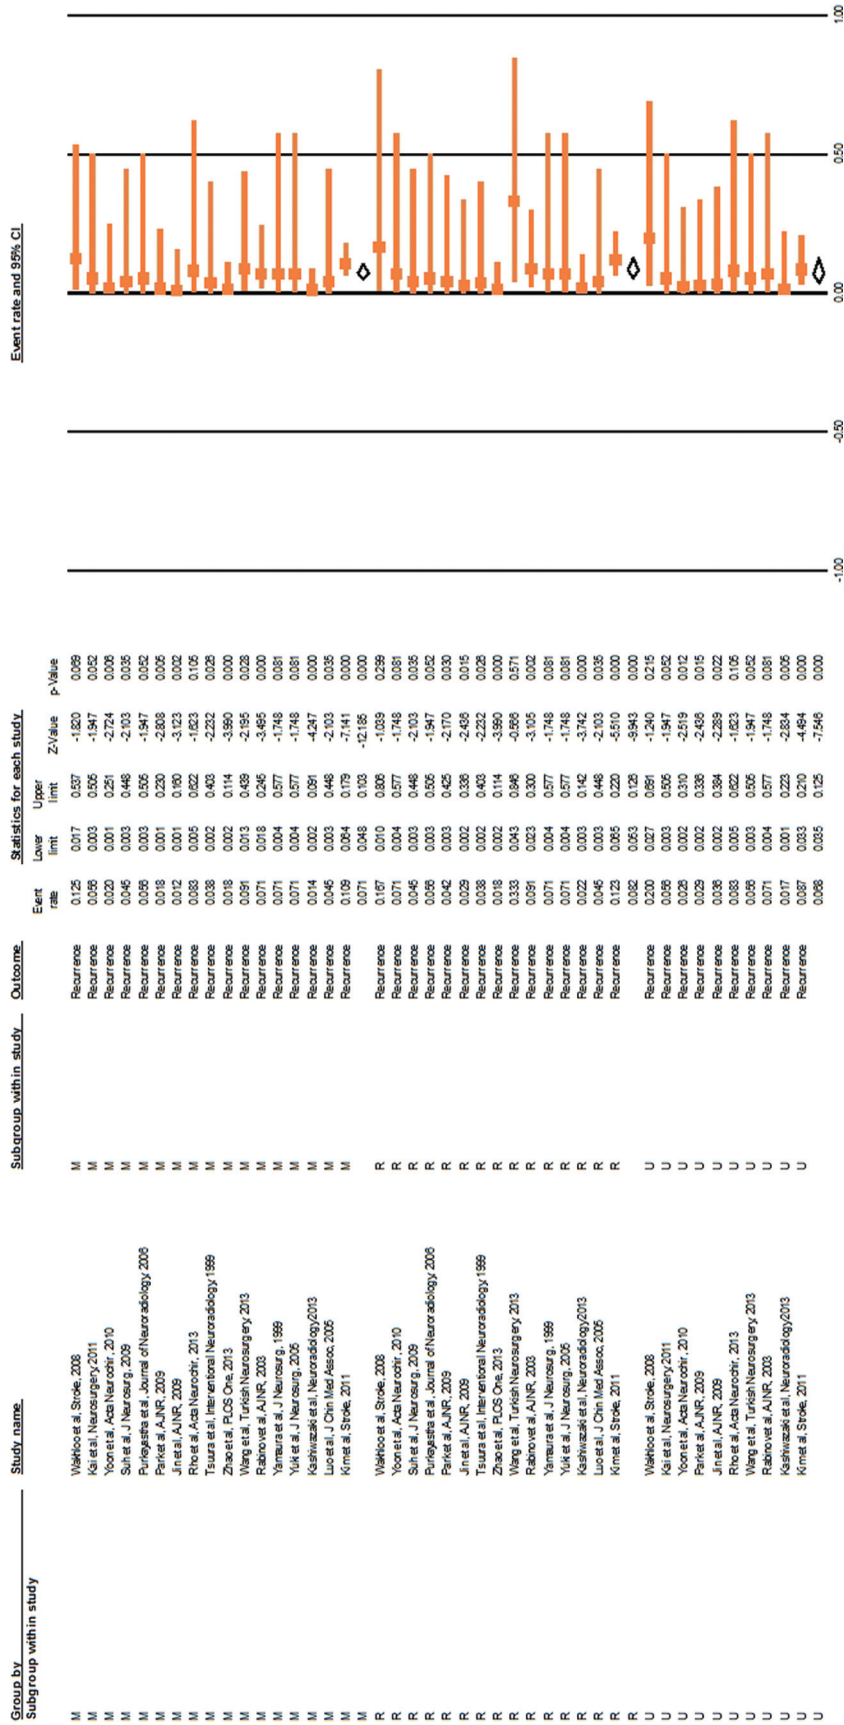

**ON-LINE FIG 7.** Recurrence rates. U indicates unruptured; R, ruptured; M, mixed.

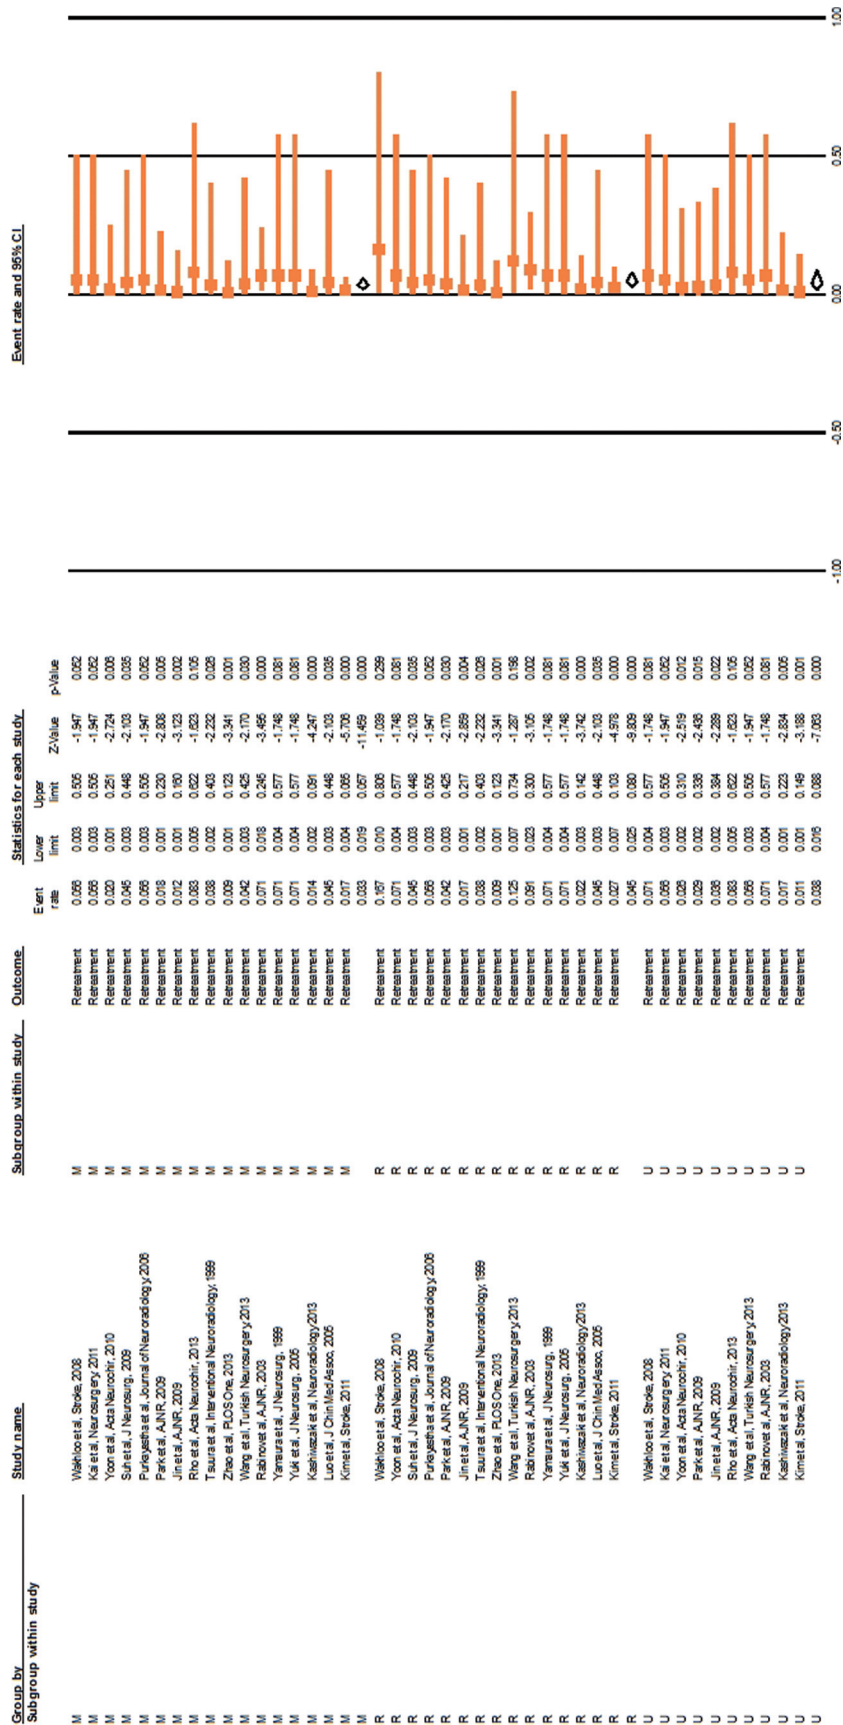

ON-LINE FIG 8. Retreatment rates. U indicates unruptured; R, ruptured; M, mixed.
